# Supplementary material for: Establishing a cost-per-result of laboratory-based, reflex Cryptococcal antigenaemia screening (CrAg) in HIV+ patients with CD4 counts less than 100 cells/μl using a Lateral Flow Assay (LFA) at a typical busy CD4 laboratory in South Africa
Source: PLoS One. 2017 Feb 6;12(2):e0171675. doi: 10.1371/journal.pone.0171675 (PMC5293213; doi:10.1371/journal.pone.0171675)
Supplement: S1 Table — Summary of costing analysis, showing all components used for the calculation of a cost per result. (XLSX) [file pone.0171675.s001.xlsx]

## Sheet: TMH_BaseCase
Tambo Memorial base case
Per Day	106
Lab	Tambo Memorial		Cost p/Result
Tests Per Annum	27579		58.642
			4.28169
Crytococcal LFA Assay										Workflow Analysis
Assumptions										Batch size	106
Laboratory	Tambo Memorial
										Testing Activity	Total Time (min) for batch size
No of CD4 <= 100 samples p/y	27579	NHLS Corporate Date Warehouse (CDW)								Prepare worklist	7.06667
Working life, years	5									Find samples	35.3333
Annual discount rate	0.04									Prepare tubes	35.3333
					Working Days		21,73			Add diluent and controls	53
Exclusions					Months		12			Add pat plasma	53
Cost of building and electricity		Base Error Rate		1.01						Add test strip	15.9
										10min incubation	10
Staff										Read results, enter wrklist	35.3333
										Enter results on LIMS	35.3333
Staff type	Number of staff	Grade	Salary p/a (CTC)	Total Cost	% of Time	Salary p/a (CTC)	Source			File samples	35.3333
Medical Technologist (Testing)	1	C2	338784	338784	0.779342	264029	NHLS Intranet	√
Lab Manager (Review)	1	D1	656827	656827	0.261728	171910	NHLS Intranet	√		Total Time (min)	315.633
										Total Time (hr)
Total				995611	1.04107	435939				8 Hours	480
										Actual (Lunch 60 and Tea 15)	405
Assets
										Time per 60	315.633
Description	Qty	Unit Cost	Total costs	Working life, years	Annual discount rate	Annual equivalent cost	Source
Pipette 40ul	1	1715.41	1715.41	5	0.04	345.37	Quotation			Testing Time %FTE	0.779342
Racks	1	301.758	301.758	5	0.04	60.7539	Quotation
										Review Activity
Total	2	2017.17	2017.17			406.124				Review time p/sample	1
										Batch size	106
Reagent Costs										Total Time (min) for batch size	106
Item	Qty Supplied	Total Cost	Cost p/Unit	Qty Used	Cost ptest	No of Tests p/a	Total Cost p/a	Source		Review Time %FTE	0.261728
CrAg LFA Kit (Cryptococcal Antigen LFA)	50	2000.7	40.014	1	40.014	27579	1.10355e+06	Quotation
PIPETTE TIPS GILSON YELLOW 5-200UL BOX OF 1000	1000	52.44	0.05244	1	0.05244	27579	1446.24	PC584037
GAUZE GEM NON WOVEN SWAB 100/Box	100	59.9982	0.599982	0.0243902	0.0146337	27579	403.583	PC549045
SARSTELT 2ML MICROTUBES 1000/BOX	1000	1675.8	1.6758	1	1.6758	27579	46216.9	P04M0161
GLOVES - LATEX POWDER FREE SMALL (100/BOX)	100	53.01	0.5301	0.0731707	0.0387878	27579	1069.73	P02G0088
BROTHER HL 5350DN LASER TONER	22	1198.04	54.4562	0.00497512	0.270927	27579	7471.88	P02A1097
A4 PAPER BOND 80 GRMS WHT TYPK (500/Ream)	500	44.118	0.088236	0.0487805	0.0043042	27579	118.705	P17S0401
50 LITRE DISPOSAL BOX complete with lid and liner	1	94.4604	94.4604	0.00110865	0.104723	27579	2888.16	P02H0924
10 LITRE SHARPS	1	57.9576	57.9576	0.00110865	0.0642545	27579	1772.08	P03S0028
Total					42.2399		1.16493e+06
Costs Summary
Annual Equivalent Costs
		Asset cost per month	Staff cost	Reagent cost	Total costs	No of Tests p/a	Cost p/Result
		406.124	435939	1.16493e+06	1.60128e+06	27579	58.0615
Annual Equivalent Costs including Error rate for staff and reagent costs
		Asset cost	Staff cost	Reagent cost	Total costs	No of Tests p/a	Cost p/Result
		406.124	440298	1.17658e+06	1.61729e+06	27579	58.642

## Sheet: Ref1_TMH_Volumes
Region	Laboratory	CrAg per day (/21.73)	CrAg per month (/12)	CrAg per annum (2014)
Gauteng	Tambo Memorial	106	2298.25	27579

## Sheet: Ref2_USD_Exchange_Rate
															13.696

## Sheet: Ref3_Lab_Staff_Cost
PAY ZONE	2015 Midpoint p/a
B3	193701
C2	338784
D1	656827

## Sheet: Ref4_CDWVolumes
RPT1005 ARV Volumes by Test Ranges NHLS->Testing Lab Combined->Fiscal Reviewed Month
Report Filter:
({Test Group} = Cd4) And ({Testing Lab Region} = Western/Northern Cape, Gauteng, Limpopo/Mpumalanga, Free State/North West, Eastern Cape, Kwa-Zulu Natal) And ({Fiscal Reviewed Year} = FY 13/14, FY 14/15)
View Filter:
({Test Range} <> Not available) And ({Fiscal Reviewed Month} = Dec 2014, Nov 2014, Oct 2014, Sep 2014, Aug 2014, Jul 2014, Jun 2014, May 2014, Apr 2014, Mar 2014, Feb 2014, Jan 2014)
Page by:
Test Group: Cd4
Metrics: Total Tests
Testing Lab Combined	<= 50	> 50 <= 100	> 100 <= 200	> 200 <= 350	> 350 <= 500	> 500	Total	<=100
Addington Laboratory	1068	946	2781	5895	5599	6726	23015	2014
Appelsbosch Laboratory			1	3	3	5	12	0
Benedictine Laboratory	2230	2060	5317	11890	12926	20008	54431	4290
Bethesda Laboratory	386	397	936	2085	2303	3985	10092	783
Butterworth Laboratory	858	846	1932	3876	4324	6567	18403	1704
Catherine Booth Laboratory		1		2		3	6	1
Cecilia Makiwane Laboratory	682	610	1364	2524	2701	5200	13081	1292
Ceza Laboratory	1	4	4	11	8	16	44	5
Charles Johnson Memorial Hospital	1054	1005	2512	5218	5429	7661	22879	2059
Charlotte Maxeke Johannesburg Academic Hospital	9902	7890	17616	32781	32342	48468	148999	17792
Chris Hani Baragwanath Laboratory	7478	6137	13697	24233	23119	34184	108848	13615
Christ The King Laboratory	794	777	1756	3865	4333	7888	19413	1571
Church Of Scotland Laboratory	361	328	737	1645	1816	2806	7693	689
De Aar Laboratory	207	210	515	878	861	1569	4240	417
Dr George Mukhari Laboratory	8523	6596	14245	26752	28001	47185	131302	15119
Dumbe Laboratory			2	3	4	3	12	0
Dundee Laboratory	596	522	1399	3000	3263	4855	13635	1118
East London Laboratory	5352	4612	10549	19258	19204	31298	90273	9964
Edendale Laboratory	6438	5829	15128	34166	40946	72149	174656	12267
Edenvale Laboratory	1	1	3	1	3	2	11	2
Ekombe Laboratory	1		2	3		6	12	1
Emmaus Laboratory						2	2	0
Ermelo Laboratory	5876	5295	12679	24840	25229	38690	112609	11171
Eshowe Laboratory	1438	1320	3668	8204	9039	15173	38842	2758
Estcourt Laboratory					1		1	0
Ganyesa Laboratory				1	1		2	0
George Laboratory	917	1075	2649	5537	6114	9567	25859	1992
George Masebe Laboratory				1	3	2	6	0
Grahamstown Laboratory	127	119	285	516	605	960	2612	246
Green Point Laboratory	3003	2804	6283	12446	14229	21274	60039	5807
Groote Schuur Laboratory	2846	2982	7744	17645	21511	35573	88301	5828
Helen Joseph Laboratory	2		2	3	7	8	22	2
Hlabisa Laboratory	1602	1660	4281	10724	14999	43632	76898	3262
Huhudi Laboratory	1210	1208	2775	5306	5759	10522	26780	2418
Kalafong Laboratory	1260	791	1375	1827	1497	3861	10611	2051
Kimberley Laboratory	2563	2535	5969	11009	11552	19203	52831	5098
King Edward Viii Laboratory	1081	929	2305	5154	6088	10373	25930	2010
Kokstad Laboratory	563	543	1348	2623	2234	2471	9782	1106
Ladysmith Laboratory	3027	3116	8141	17882	19842	34795	86803	6143
Letaba Laboratory	6831	5326	12550	22898	22175	35420	105200	12157
Livingstone Laboratory	4927	4834	11224	19994	19800	32238	93017	9761
Madadeni Laboratory	2407	1861	4971	10440	11375	17267	48321	4268
Mafikeng Laboratory	958	895	2011	3999	4161	6071	18095	1853
Mahatma Gandhi Laboratory	3641	4287	11821	28549	35809	65336	149443	7928
Manapo Laboratory	1664	1425	3700	8165	9357	17778	42089	3089
Manguzi Laboratory			1				1	0
Mbongolwane Laboratory	1	3	7	5	7	19	42	4
Mokopane Laboratory	1559	1250	2643	5359	5563	9881	26255	2809
Montebello Laboratory	30	52	127	309	459	1010	1987	82
Mosvold Laboratory		2	4	15	17	32	70	2
Mthatha Laboratory	4333	4200	10021	20143	21653	34594	94944	8533
Nelspruit Laboratory	9466	8125	19727	38314	36591	55426	167649	17591
Newcastle Laboratory			1	2		4	7	0
Ngwelezana Laboratory	3353	2877	7615	17408	18944	28756	78953	6230
Nkandla Laboratory		1	2	6	5	14	28	1
Nkonjeni Laboratory	4	5	6	17	22	35	89	9
Northdale Laboratory		1	2	3	3	12	21	1
Pelonomi Laboratory	4298	4049	9688	19081	19669	31615	88400	8347
Pholosong Laboratory	1	1		3		3	8	2
Polokwane Laboratory	8336	7079	14911	26803	27384	47262	131775	15415
Port Elizabeth Laboratory		1				1	2	1
Port Shepstone Laboratory	3224	3190	8525	20436	24194	41705	101274	6414
Prince Mshiyeni Memorial Hospital	4398	4256	11639	26579	29867	45229	121968	8654
Queenstown Laboratory	989	1038	2326	4559	4231	5570	18713	2027
Rk Khan Laboratory	3187	3183	8567	19621	23215	35894	93667	6370
Rustenburg Laboratory	3906	3394	7646	13392	12442	17535	58315	7300
Shongwe Laboratory	854	674	1784	4185	4867	6432	18796	1528
Siloam Laboratory						2	2	0
South Rand Laboratory				1			1	0
St Apollinaris Laboratory	2	1	1	15	11	17	47	3
St Elizabeth Laboratory	3582	3878	8732	16995	18630	31882	83699	7460
St Mary's Laboratory	3	3	2	3	7	18	36	6
Stanger Laboratory	2205	1889	5316	12355	15060	24490	61315	4094
Tambo Memorial Laboratory	15152	12427	29557	56766	59624	94092	267618	27579
Taung Laboratory					2		2	0
Tembisa Laboratory	8078	6487	14474	25749	25159	36714	116661	14565
Tintswalo Laboratory	865	731	1689	3676	4315	8088	19364	1596
Tshepong Laboratory	6177	5536	12379	22841	23488	41191	111612	11713
Tshilidzini Laboratory	574	489	1137	1932	1599	2224	7955	1063
Tshwane Academic Laboratory	4506	3727	8380	16165	17483	28352	78613	8233
Tygerberg Laboratory	2346	2497	6632	14466	17418	30829	74188	4843
Umphumulo Laboratory	2		4	4	4	25	39	2
Universitas Academic Laboratory	1	2	3	6	4	7	23	3
Upington Laboratory	203	330	667	1369	1434	2724	6727	533
Vryheid Laboratory	2387	2435	6137	12007	11618	15993	50577	4822
Welkom Laboratory	4105	3654	8554	15914	16100	23852	72179	7759
Witbank Laboratory	1308	1282	2918	5877	6002	8114	25501	2590
Worcester Laboratory	1179	1340	3342	6650	7236	14236	33983	2519
Total	192489	171865	411443	824883	882899	1444679	3928258	364354
