# Supplementary material for: Establishing a cost-per-result of laboratory-based, reflex Cryptococcal antigenaemia screening (CrAg) in HIV+ patients with CD4 counts less than 100 cells/μl using a Lateral Flow Assay (LFA) at a typical busy CD4 laboratory in South Africa
Source: PLoS One. 2017 Feb 6;12(2):e0171675. doi: 10.1371/journal.pone.0171675 (PMC5293213; doi:10.1371/journal.pone.0171675)
Supplement: S2 Table — Breakdown of time allocated for all components of testing. (XLSX) [file pone.0171675.s002.xlsx]

## Sheet: Supp_1_LFA
Activity	Time per batch (minutes) n=28
Prepare worklist	2
Find samples	9
Prepare tubes	9
Add diluent and controls	14
Add pat plasma	14
Add test strip	4
10min incubation	10
Read results, enter wrklist	9
Enter results on LIMS	9
File samples	9
Review	28
Total	117
Reference: PONE-D-16-26192R1
